# Supplementary material for: Disposition of Cefquinome in Turkeys (Meleagris gallopavo) Following Intravenous and Intramuscular Administration
Source: MDPI journal article supplement (doi:10.3390/pharmaceutics13111804), 2021-10-28

Supplementary Material

# Disposition of Cefquinome in Turkeys (*Meleagris gallopavo*) Following Intravenous and Intramuscular Administration

Mohamed Elbadawy <sup>1,\*</sup>, Ahmed Soliman <sup>2</sup>, Amira Abugomaa <sup>3</sup>, Adel Alkhedaide <sup>4</sup>, Mohamed Mohamed Soliman <sup>4</sup> and Mohamed Aboubakr <sup>1</sup>

<sup>1</sup> Department of Pharmacology, Faculty of Veterinary Medicine, Benha University, 13736 Moshtohor, Toukh, Qalioubiya, Egypt; mohamed.aboubakr@fvtm.bu.edu.eg

<sup>2</sup> Pharmacology Department, Faculty of Veterinary Medicine, Cairo University, 12211 Giza, Egypt; galalpharma@cu.edu.eg

<sup>3</sup> Faculty of Veterinary Medicine, Mansoura University, 35516 Mansoura, Dakahliya, Egypt

<sup>4</sup> Clinical Laboratory Sciences Department, Turabah University College, Taif University, Taif 21995, Saudi Arabia; a.khedaide@tu.edu.sa (A.A.); mmsoliman@tu.edu.sa (M.M.S.)

\* Correspondence: mohamed.elbadawy@fvtm.bu.edu.eg (M.E.); s193249s@st.go.tuat.ac.jp (A.A.); Tel.: +81-90-2076-8122 (M.E.); +81-90-1238-1298 (A.A.)

**Table S1.** Cefquinome (CFQ) concentration in individual turkey at different sampling time after intravenous (IV) and intramuscular (IM) administration of 2 mg/kg body weight.

| IV    |         |       |        |        |       |       |       |        |         |
|-------|---------|-------|--------|--------|-------|-------|-------|--------|---------|
| Time  | Turkeys |       |        |        |       |       |       | Mean   | SD      |
|       | 1       | 2     | 3      | 4      | 5     | 6     | 7     |        |         |
| 0.083 | 5.27    | 5.31  | 5.02   | 5.32   | 5.37  | 5.02  | 5.42  | 5.23   | 0.1623  |
| 0.166 | 4.12    | 4.10  | 4.04   | 4.17   | 4.24  | 3.95  | 4.16  | 4.11   | 0.0946  |
| 0.25  | 3.56    | 3.52  | 3.46   | 3.68   | 3.71  | 3.35  | 3.60  | 3.55   | 0.125   |
| 0.5   | 2.45    | 2.40  | 2.49   | 2.53   | 2.62  | 2.36  | 2.51  | 2.48   | 0.0864  |
| 1     | 1.59    | 1.49  | 1.47   | 1.66   | 1.75  | 1.39  | 1.64  | 1.57   | 0.126   |
| 2     | 0.870   | 0.830 | 0.850  | 0.930  | 0.940 | 0.780 | 0.920 | 0.874  | 0.0591  |
| 4     | 0.360   | 0.320 | 0.310  | 0.390  | 0.420 | 0.290 | 0.410 | 0.357  | 0.0516  |
| 6     | 0.120   | 0.110 | 0.100  | 0.140  | 0.150 | 0.100 | 0.140 | 0.123  | 0.0206  |
| 8     | 0.045   | 0.042 | 0.038  | 0.052  | 0.056 | 0.039 | 0.048 | 0.0457 | 0.00670 |
| 12    | 0.01    | 0.012 | 0.001  | 0.014  | 0.015 | 0.010 | 0.013 | 0.0107 | 0.00468 |
| IM    |         |       |        |        |       |       |       |        |         |
| 0.083 | 0.70    | 0.60  | 0.660  | 0.750  | 0.830 | 0.540 | 0.770 | 0.693  | 0.101   |
| 0.166 | 1.45    | 1.34  | 1.42   | 1.50   | 1.57  | 1.330 | 1.56  | 1.45   | 0.0969  |
| 0.25  | 2.28    | 2.12  | 2.21   | 2.34   | 2.43  | 2.08  | 2.36  | 2.26   | 0.129   |
| 0.5   | 3.11    | 3.08  | 3.05   | 3.17   | 3.26  | 3.01  | 2.24  | 2.99   | 0.340   |
| 1     | 2.05    | 1.95  | 1.99   | 2.10   | 2.24  | 1.92  | 2.17  | 2.06   | 0.117   |
| 2     | 0.910   | 0.850 | 0.870  | 0.970  | 1.02  | 0.820 | 0.990 | 0.919  | 0.0763  |
| 4     | 0.390   | 0.340 | 0.350  | 0.440  | 0.44  | 0.30  | 0.450 | 0.387  | 0.0588  |
| 6     | 0.150   | 0.110 | 0.140  | 0.170  | 0.210 | 0.130 | 0.190 | 0.157  | 0.0350  |
| 8     | 0.060   | 0.053 | 0.056  | 0.0660 | 0.067 | 0.055 | 0.070 | 0.0610 | 0.00668 |
| 12    | 0.015   | 0.012 | 0.0130 | 0.018  | 0.019 | 0.011 | 0.019 | 0.0153 | 0.00340 |

**Table S2.** Pharmacokinetic parameters of cefquinome (CFQ) in individual turkey after intravenous (IV) and intramuscular (IM) administration of 2 mg/kg body weight.

| IV                         |                               |        |        |        |        |        |        |        |        |         |
|----------------------------|-------------------------------|--------|--------|--------|--------|--------|--------|--------|--------|---------|
| Parameter                  | Turkeys                       |        |        |        |        |        |        |        | Mean   | SD      |
|                            | Unit                          | 1      | 2      | 3      | 4      | 5      | 6      | 7      |        |         |
| $\alpha$                   | 1/h                           | 5.06   | 5.09   | 4.25   | 4.78   | 5.08   | 4.74   | 5.50   | 4.93   | 0.390   |
| $t_{1/2\alpha}$            | h                             | 0.137  | 0.136  | 0.163  | 0.145  | 0.137  | 0.146  | 0.126  | 0.141  | 0.0117  |
| $\beta$                    | 1/h                           | 0.465  | 0.446  | 0.471  | 0.440  | 0.437  | 0.417  | 0.448  | 0.446  | 0.0180  |
| $t_{1/2\beta}$             | h                             | 1.49   | 1.56   | 1.47   | 1.58   | 1.59   | 1.66   | 1.55   | 1.56   | 0.0631  |
| $C_0$                      | $\mu\text{g/mL}$              | 6.71   | 6.81   | 6.15   | 6.66   | 6.76   | 6.32   | 7.03   | 6.63   | 0.302   |
| $\text{AUC}_{0-t}$         | $\mu\text{g}\cdot\text{h/mL}$ | 6.187  | 5.93   | 5.85   | 6.52   | 6.74   | 5.58   | 6.51   | 6.19   | 0.423   |
| $\text{AUC}_{t-\infty}$    | $\mu\text{g}\cdot\text{h/mL}$ | 0.0215 | 0.0269 | 0.0191 | 0.0318 | 0.0344 | 0.0192 | 0.029  | 0.0259 | 0.00617 |
| $\text{AUC}_{0-\infty}$    | $\mu\text{g}\cdot\text{h/mL}$ | 6.21   | 5.96   | 5.87   | 6.55   | 6.78   | 5.60   | 6.54   | 6.22   | 0.428   |
| $\text{AUC}_{\text{rest}}$ | %                             | 0.347  | 0.452  | 0.325  | 0.486  | 0.507  | 0.342  | 0.444  | 0.415  | 0.0749  |
| $\text{AUMC}_{0-\infty}$   | $\mu\text{g}\cdot\text{h/mL}$ | 10.4   | 9.86   | 9.43   | 11.6   | 12.2   | 8.98   | 11.5   | 10.6   | 1.23    |
| MRT                        | h                             | 1.68   | 1.66   | 1.61   | 1.77   | 1.80   | 1.60   | 1.77   | 1.70   | 0.0821  |
| $\text{Vd}_{\text{ss}}$    | L/kg                          | 0.542  | 0.556  | 0.547  | 0.540  | 0.532  | 0.573  | 0.539  | 0.547  | 0.0133  |
| $\text{CL}_{\text{tot}}$   | L/kg/h                        | 0.322  | 0.336  | 0.341  | 0.305  | 0.295  | 0.357  | 0.306  | 0.323  | 0.0255  |
| IM                         |                               |        |        |        |        |        |        |        |        |         |
| $K_a$                      | 1/h                           | 2.77   | 2.22   | 2.57   | 3.04   | 3.06   | 2.10   | 4.45   | 2.89   | 0.783   |
| $t_{1/2ab}$                | h                             | 0.250  | 0.312  | 0.270  | 0.228  | 0.227  | 0.330  | 0.156  | 0.253  | 0.0584  |
| $K_{el}$                   | 1/h                           | 0.415  | 0.370  | 0.423  | 0.406  | 0.406  | 0.413  | 0.402  | 0.405  | 0.0170  |
| $t_{1/5kel}$               | h                             | 1.67   | 1.88   | 1.64   | 1.71   | 1.71   | 1.68   | 1.72   | 1.71   | 0.0765  |
| $\text{AUC}_{0-t}$         | $\mu\text{g}\cdot\text{h/mL}$ | 5.92   | 6.07   | 5.66   | 6.58   | 6.25   | 5.35   | 5.4912 | 5.90   | 0.435   |
| $\text{AUC}_{t-\infty}$    | $\mu\text{g}\cdot\text{h/mL}$ | 0.0361 | 0.0472 | 0.0308 | 0.0468 | 0.0443 | 0.0266 | 0.0325 | 0.0378 | 0.00836 |
| $\text{AUC}_{0-\infty}$    | $\mu\text{g}\cdot\text{h/mL}$ | 5.96   | 5.52   | 5.69   | 6.30   | 6.62   | 5.38   | 6.12   | 5.94   | 0.443   |
| $\text{AUC}_{\text{rest}}$ | %                             | 0.607  | 0.772  | 0.541  | 0.707  | 0.704  | 0.495  | 0.588  | 0.630  | 0.100   |
| $\text{AUMC}_{0-\infty}$   | $\mu\text{g}\cdot\text{h/mL}$ | 12.2   | 10.78  | 11.37  | 13.4   | 14.3   | 10.5   | 13.8   | 12.3   | 1.5219  |
| MRT                        | h                             | 2.05   | 1.95   | 2.00   | 2.13   | 2.15   | 1.95   | 2.26   | 2.07   | 0.117   |
| MAT                        | h                             | 0.368  | 0.296  | 0.393  | 0.362  | 0.349  | 0.349  | 0.499  | 0.374  | 0.0625  |
| $C_{\text{max}}$           | $\mu\text{g/mL}$              | 2.76   | 2.68   | 2.71   | 2.81   | 2.93   | 2.63   | 2.42   | 2.71   | 0.1611  |
| $T_{\text{max}}$           | h                             | 0.560  | 0.574  | 0.562  | 0.556  | 0.559  | 0.573  | 0.520  | 0.558  | 0.0181  |
| F                          | %                             | 95.9   | 92.7   | 96.9   | 96.1   | 97.7   | 96.1   | 93.5   | 95.6   | 1.78    |

$\alpha$ ; distribution rate constant,  $t_{1/2\alpha}$ ; distribution half-life,  $\beta$ ; elimination rate constant after IV injection,  $t_{1/2\beta}$ ; elimination half-life after IV injection,  $C_0$ ; concentration at zero time (immediately after single IV injection),  $\text{AUC}_{0-t}$ ; area under plasma concentration-time curve from zero time to last sampling time,  $\text{AUC}_{t-\infty}$ ; area under plasma concentration-time curve from last sampling time to infinity,  $\text{AUC}_{0-\infty}$ ; area under plasma concentration-time curve from zero time to infinity,  $\text{AUC}_{\text{rest}}$ ; percent of the rest area under the curve;  $\text{AUMC}_{0-\infty}$ ; area under moment curve from zero time to infinity, MRT; mean residence time,  $\text{Vd}_{\text{ss}}$ ; volume of distribution at steady-state,  $\text{CL}_{\text{tot}}$ ; total body clearance;  $K_a$ ; absorption rate constant;  $t_{1/2ab}$ ; absorption half-life,  $K_{el}$ ; elimination rate constant after IM injection,  $t_{1/5kel}$ ; elimination half-life after IM injection, MAT; mean absorption time,  $C_{\text{max}}$ ; maximum plasma concentration,  $T_{\text{max}}$ ; time to peak plasma concentration, F; absolute bioavailability.

**Figure S1.** Representative High-performance liquid chromatography chromatograms of cefquinome (CFQ) from standard and spiked turkeys' plasma (A: standard, B: spiked plasma).

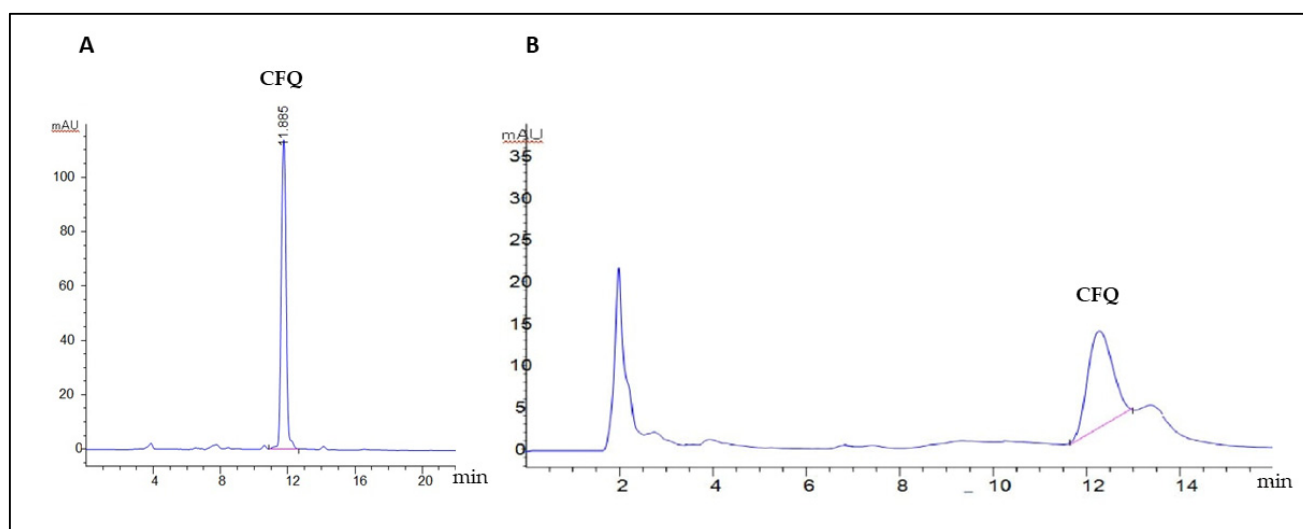

Supplement: s1 [file s1]
